1 **Title. FungalRoot: Global online database of plant mycorrhizal associations**

2 **Authors:** Nadejda A. Soudzilovskaia<sup>1,\*</sup>, Stijn Vaessen<sup>1,\*\*</sup>, Milargos Barcelo<sup>1,\*\*</sup>, Jinhong  
3 He<sup>2</sup>, Saleh Rahimlou<sup>3</sup>, Kessy Abarenkov<sup>3</sup>, Mark C. Brundrett<sup>4</sup>, Sofia Gomes<sup>1</sup>, Vincent  
4 Merckx<sup>4</sup>, Leho Tedersoo<sup>3,\*</sup>

5 \*corresponding authors with equal contribution. The data inquiries should be addressed to  
6 Nadejda Soudzilovskaia [n.a.soudzilovskia@cml.leidenuniv.nl](mailto:n.a.soudzilovskia@cml.leidenuniv.nl); tel +31 643051830;

7 \*\* authors equally contributed to the paper, being the main data compilers.

8 **Authors affiliations:**

9 <sup>1</sup> Environmental Biology Department, Institute of Environmental Sciences, CML, Leiden  
10 University; Einsteinweg 2, 2333 CC Leiden, The Netherlands

11 <sup>2</sup> Chinese Academy of Sciences; South China Botanical Garden

12 <sup>3</sup> Institute of Ecology and Earth Sciences, University of Tartu, 14a Ravila, 50411 Tartu,  
13 Estonia  
14 <sup>4</sup> School of Biological Sciences, Faculty of Science, University of Western Australia, Crawley,  
14 6009 WA, Australia

15 <sup>4</sup> Naturalis Biodiversity Centre, Leiden, The Netherlands

16

17 **Total word count for the main body of the text: 4.139**

18 - **Introduction: 785**

19 - **Materials and Methods: 1.937**

20 - **Results: 590**

21 - **Discussion: 790**

22 **The number of figures: 4; all figures should be published in colour**

23 **The number of tables: 1**

24 **The number of Table in Supporting information: 3.**

25

26

27 **Key words:** arbuscular mycorrhiza, biogeography, ectomycorrhiza, ericoid mycorrhiza  
28 mycorrhizal root colonization, mycorrhizal type, non-mycorrhizal plants, orchid mycorrhiza

29 **Summary**

- 30 • The urgent need to better understand profound impacts of mycorrhizas on functioning  
31 of terrestrial ecosystems, along with recent debates on resolving plant mycorrhizal  
32 associations, indicate that there is a great need for a comprehensive data of plant  
33 mycorrhizal associations able to support testing of ecological, biogeographic and  
34 phylogenetic hypotheses.
- 35 • Here present a database, FungalRoot, which summarizes publicly available data on  
36 plant mycorrhizal type and intensity of root colonization by mycorrhizal fungi,  
37 accompanied by rich meta-data. We collected and digitized data on plant mycorrhizal  
38 colonization intensity published until April 2019 in 9 globally most important  
39 languages. The data were assessed for quality and updated for plant taxonomy.
- 40 • The FungalRoot database contains 36,303 species by site observations for 14,870 plant  
41 species, tripling the previously available amount in any compilation. The great  
42 majority of ectomycorrhizal and ericoid mycorrhizal plants are trees and shrubs, 92%  
43 and 85% respectively. The majority of arbuscular mycorrhizal and of non-mycorrhizal  
44 plant species are herbaceous (50% and 70%).
- 45 • Besides acting as a compilation of referenced observations, our publicly available  
46 database provides a recommendation list of plant mycorrhizal status for ecological and  
47 evolutionary analyses to promote research on the links between above- and  
48 belowground biodiversity and functioning of terrestrial ecosystems.

49

50

51 **Introduction**

52 Mycorrhizal interactions with fungi represent one of the key innovations of terrestrial plants.  
53 Mycorrhiza is a mutualistic association between plant roots and fungi, where plants provide  
54 photosynthetically derived carbohydrates to fungi and fungi deliver nutrients and water to  
55 plants and offer protection from abiotic and biotic stress (Smith & Read, 2008). Based on  
56 tomy and phylogeny, four principal types of mycorrhiza are recognized: arbuscular  
57 mycorrhiza (AM), ectomycorrhizal (EcM), ericoid mycorrhiza (ErM) and orchid mycorrhiza  
58 (OM) (Brundrett & Tedersoo, 2018). While most vascular plant species form mycorrhizal  
59 symbiosis of only one type, AM-colonized plants may sometimes co-occur with EcM and  
60 ErM fungi (Smith & Read, 2008; Brundrett & Tedersoo, 2018).

61 Depending on mycorrhizal types and particular species, mycorrhizal fungi may build  
62 extensive mycelial networks that sustain nutrient acquisition and promote plant seedling  
63 establishment (Leake *et al.*, 2004; Soudzilovskaia, N.A. *et al.*, 2015). Mycorrhizal types differ  
64 in plant nutrition and therefore affect plant carbon allocation strategies (Veresoglou *et al.*,  
65 2012b), litter quality (Cornelissen *et al.*, 2001) cf (Koele *et al.*, 2012) and decomposition  
66 (Cornelissen *et al.*, 2001; Koele *et al.*, 2012; Elumeeva *et al.*, 2018), biogeochemical cycles  
67 (Veresoglou *et al.*, 2012a; Soudzilovskaia *et al.*, 2015; Averill & Hawkes, 2016; Tedersoo &  
68 Bahram, 2019), and plant community composition (van der Heijden *et al.*, 1998; Klironomos  
69 *et al.*, 2000; Klironomos *et al.*, 2011; Elumeeva *et al.*, 2018). Information about mycorrhizal  
70 type and colonization intensity of mycorrhizal infection of plant roots is crucial for  
71 understanding plant and fungal effects on ecosystem-level and global biogeochemical  
72 processes (Phillips *et al.*, 2013; Terrer *et al.*, 2016).

73 Plants also differ in the level of root colonisation by mycorrhizal fungi, which may have an  
74 effect on the efficiency of nutrition (Karst *et al.*, 2008; Hoeksema *et al.*, 2010; Treseder,  
75 2013) or protection against pathogens (Smith & Read, 2008). Much of the colonisation level  
76 seems to be related to plant and fungal identity but also to seasonality and environmental  
77 conditions (Klironomos, 2000; Maltz & Treseder, 2015; Hoeksema *et al.*, 2018). Further, the  
78 data about root colonization by mycorrhizal fungi provides insights into the level of intimacy  
79 of the plant-fungal relation, linked to the plant nutrition effectiveness and plant global  
80 environmental drivers (Soudzilovskaia *et al.*, 2015). Several plant species so-called  
81 ‘facultatively mycorrhizal plants’ may develop mycorrhizas in certain conditions but remain  
82 non-mycorrhizal in other conditions, depending on nutrient availability and neighbouring  
83 plants (Brundrett, 2009)

84 However, the type and level of infection by mycorrhizal fungi is unknown for the great  
85 majority of vascular plants and, when available, this information is scattered in multiple  
86 narrow-focused data sets, most of which cover specific Earth regions or mycorrhizal types.  
87 Many sources of mycorrhizal records contain multiple errors, which have accumulated and  
88 passed on through literature reviews. Many of these errors are derived from alternative  
89 interpretations of mycorrhiza and mycorrhizal types, which is especially common in old  
90 literature (Brundrett & Tedersoo, 2019; Bueno, 2019). Unfortunately, these incorrect  
91 observations have been commonly used in traits-based case studies or meta-analyses without  
92 critical evaluation of the source reliability, which may have caused slight to fatal errors in  
93 interpretation and conclusions literature (Brundrett & Tedersoo, 2019). Furthermore, most of  
94 data compilations lack geographical information and any environmental metadata about the  
95 study sites. Also, substantial part of fundamental mycorrhizal research has been published in  
96 languages other than English or German or French, which have remained mostly overlooked  
97 in reviews and data sets. Finally, virtually none of the existing data compilations distinguish  
98 between research focused on all mycorrhizal types detected for a particular species and  
99 specific mycorrhizal types (ignoring others when present).

100 Here, we present a global database FungalRoot, which accumulates information about plant  
101 mycorrhizal status and root colonization intensity, The FungalRoot database was assembled  
102 based on previously published reviews, local databases and a large number of yet neglected  
103 case studies and recent studies published in nine globally most important languages. The  
104 database enables to distinguish between reports of a presence of a particular mycorrhizal type,  
105 and reports where the plants were checked for *all* existing mycorrhizal types. In addition, our  
106 database provides information about the locality, ecosystem type, soil chemical data, and the  
107 method of mycorrhizal assessment that enable users to build more specific, local reference  
108 databases. FungalRoot offers possibilities to provide curator and third-party expert opinion  
109 regarding data reliability. Based on the current version of the database we provide a genus-  
110 level recommendation list for mycorrhizal type assignment of vascular plants, considering  
111 taxonomic information, habitat and phylogenetic conservation (Brundrett, M & Tedersoo, L,  
112 2018). This list is also included into the FungalRoots database as a separate and, as well is  
113 open for third-party expert opinion. This data considerably advances the previously available  
114 major check list of plant mycorrhizal status (Wang & Qiu, 2006; Akhmetzhanova *et al.*, 2012)  
115 in number of plant taxa considered, and in the accuracy of mycorrhizal type diagnoses. The

116 genus-level recommendation list for using the mycorrhizal trait in comparative studies and  
117 meta-analyses, in which mycorrhizal types are not empirically determined.

## 118 **Methods**

### 119 **Literature compilation**

120 We combined data from 1775 sources of literature including articles obtained through Google  
121 Scholar searches, large compilations of information on mycorrhizal colonization type and  
122 intensity in plants (Harley & Harley, 1987; Wang & Qiu, 2006; Akhmetzhanova *et al.*, 2012;  
123 Hempel *et al.*, 2013; Soudzilovskaia, *et al.*, 2015; Gerz *et al.*, 2016), and authors' personal  
124 literature collections. For the Google Scholar search, we used boolean search 'mycorrhiza'  
125 AND 'colonisation' AND 'name of each country' in English and in other major languages  
126 (incl. German, Chinese, Farsi, French, Indonesian, Portuguese, Russian, Spanish). The  
127 sources were downloaded from the Internet, acquired from the authors or ordered using  
128 interlibrary loans. We focused mainly on papers with observations on at least five species or  
129 >10 observations for a lower number of species separable by space or specific treatments.  
130 Large data compilations were traced to the original references in order to add geographical  
131 and ecological metadata, check for methods and avoid accumulating errors.

132 Presence of mycorrhizal status information of plant species or genus was the minimum  
133 requirement to include observations in the database. In cases when the data on root  
134 colonization intensity by specific mycorrhizal type was reported, we included this data as well  
135 along with the method of colonization assessment. All collected references were carefully  
136 checked for information about geographical location, environmental and habitat conditions  
137 (See Table 1 for the lists of included variables and character states).

138 Data about site soil conditions were added to each record when available. Nitrate ( $\text{NO}^{-3}$ ) or  
139 ammonium ( $\text{NH}^{+4}$ ) values were converted to N based on atomic mass. Eg. X mg  $\text{NO}_3$  /kg =  
140  $X * 14/62$  mg N /kg, as the atomic mass ratio between N and  $\text{NO}_3$  is 14/62. Similarly for  
141  $\text{NH}^{+4}$  with atomic mass ratio of 14/18 between N and  $\text{NH}^{+4}$ . Minimum and maximum values,  
142 or ranges, were added when available.

143

144

145

## 146 **Assessment of mycorrhizal types**

147 Here we follow the mycorrhiza definitions of Brundrett & Tedersoo (2018) that were largely  
148 built on Smith & Read (2008). Because the associated fungi were rarely identified and their  
149 benefits to plants were not addressed in studies addressing mycorrhizal status or level of  
150 colonisation of natural plants, we relied solely on the morphological criteria in most cases  
151 (except Australian studies in 1980s and early 1990s that involved synthesis experiments). In  
152 brief, the presence of intracellular arbuscules, coils or pelotons was required to consider plants  
153 AM, ErM or OM, respectively. For EcM, the presence of a Hartig net or a well-developed  
154 mantle (>1 hyphal layer) was required. Although Bueno (2019) argued that arbuscular  
155 colonisation is not required for functional AM symbiosis, there is ample evidence that well-  
156 colonized plants perform better in terms of nutrition and protection from pathogens and that  
157 incapacity of forming arbuscules is a characteristic of NM or facultatively mycorrhizal plants  
158 in natural conditions. Therefore, we considered only hyphal root colonisation and molecular  
159 identification from root samples insufficient to consider the plants mycorrhizal. Hyphae of  
160 AM, EcM and ErM fungi proliferate in surface-degraded roots of plants belonging to other  
161 mycorrhizal types (Toju *et al.*, 2014).

162 Misdiagnoses of mycorrhizal types are a common problem in scientific literature (Brundrett,  
163 2017; Tedersoo & Brundrett, 2017; Brundrett & Tedersoo, 2019) and these could lead to  
164 errors in analyses based on data collected by literature compilations (Brundrett & Tedersoo,  
165 2019). We considered it important to report in the database the original diagnosis of  
166 mycorrhizal type provided by in the original publication. Simultaneously, we examined each  
167 record in our database against contemporary knowledge of plant species mycorrhizal types  
168 (consensus of records in this study; specific information in (Merckx, 2013; Kohout, 2017;  
169 Tedersoo & Brundrett, 2017; Brundrett & Tedersoo, L, 2018; Brundrett & Tedersoo, 2019)).  
170 Based on this examination, we provided one or two expert opinions commenting on the  
171 reliability of the original diagnosis for each contradictory record (see subsection “Data  
172 records”). Based on the database records and the expert opinions, we prepared a  
173 recommendation list of mycorrhizal status at the plant genus level (Table S1). Here we  
174 considered individual studies of low reliability and excluded these from further comparisons  
175 if >20% of records therein conflicted with other studies. We anticipate, however, that  
176 differences in NM and AM habit may exist especially in facultatively mycorrhizal plants and  
177 seasonally, depending also on age and environmental conditions (Bueno, 2019).

178 Based on individual reports for species, we assigned mycorrhizal type or NM status to the  
179 entire genus if >67% of reports (at least two observations) converged. In putatively AM and  
180 NM groups, there were multiple genera that were reported to be either AM or NM in 33%-  
181 67% of occasions. These facultatively arbuscular mycorrhizal taxa were encoded as AM-NM.  
182 In predominately AM and EcM plant families, we considered a single positive report  
183 sufficient to consider the genus mycorrhizal. If there was a single NM report in these  
184 mycorrhizal families, the mycorrhizal status was considered unsettled, to avoid considering  
185 these prematurely non-mutualistic or the report as unreliable. For genera that had no reports or  
186 single negative reports or two conflicting reports, we further relied on the list of putative NM  
187 plant families (Brundrett & Tedersoo, 2018) and EcM plant genera (Tedersoo, 2017) and  
188 studies considered unreliable in the first phase. Several aquatic and heterotrophic plant genera  
189 in the putatively NM plant families were considered as AM-NM because of multiple  
190 independent evidence for arbuscule formation.

191 According to our data, 86 plant families lack information about mycorrhizal types (Table S2).  
192 Following (Brundrett & Tedersoo, 2018), we considered that *Brassicales*, *Caryophyllales* and  
193 *Cyperales* included multiple families with mostly NM or AM-NM species. In *Brassicales*, we  
194 partly relied on the distribution of mycorrhiza-related genes (Delaux et al. 2014). If these  
195 reports were missing (*Brassicales*) and for other putatively AM-NM orders, we considered the  
196 mycorrhizal status of unstudied families unsettled. For AM orders that contain only AM  
197 genera, we considered these families as putatively AM. We also included specific comments  
198 on species of EcM plants that have a larger group of congeneric AM species (*Pisonia*,  
199 *Persicaria*, *Kobresia*). For Australian Fabaceae, Goodeniaceae, Myrtaceae and Asteraceae,  
200 this was unfeasible because of paucity of such information. We identified only a single  
201 consistently NM plant species *Astragalus alpinus* within a mycorrhizal genus.

202

### 203 **Technical validation**

204 For correction and standardization of the species names included in the database, all  
205 observations were checked using the Taxonomic Name Resolution Service (TNRS)  
206 (<http://tnrs.iplantcollaborative.org/>). When partial matches were found, species names were  
207 corrected manually according to best suggestion given by the TNRS. When no suggestions  
208 were given, the species name was checked in the original papers. If after this step the species

209 name could not be corroborated, the record was removed, or, where possible, treated at the  
210 level of genus.

## 211 **Data Records**

212 The data are organized into five categories: (1) observation identification; (2) location; (3) soil  
213 conditions; (4) host plant description; and (5) description of mycorrhizal colonization (Table  
214 1). The fields for literature references refer to one particular study and include  
215 ‘publication\_doi’ (for a Digital Object Identifier, DOI, of the citation) and  
216 ‘original\_reference’ (full text citation in GoogleScholar APA format, necessary for older  
217 literature with no DOI or other alphabet). Chinese, Japanese, Persian, Arabic, Cyrillic, etc.  
218 alphabets also conform to this field, although sources in these languages except Chinese have  
219 been converted or translated to the main format during data management or within previous  
220 reviews for simplicity. The field ‘plot\_name’ enables to segregate the study into smaller units  
221 by location but also by time, treatment or any custom difference. It is represented by the name  
222 of locality or locality-by-treatment combination. All records within a plot have the same  
223 geographical coordinates. Identical plot names in different studies are not matched unless  
224 their coordinates match.

225 For the location category, ‘habitat naturality’ enables selection amongst eight possibilities  
226 (plus ‘other’ if none conform) that are related to the experimental conditions or habitat  
227 structure; ‘biome’ provides information about the overall climate and vegetation type;  
228 ‘country’ represents a user-selected field for countries (autonomous and overseas regions  
229 separately) following MIMARKS standards; ‘latitude’ and ‘longitude’ represent geographical  
230 coordinates, whereas ‘elevation’ represents altitude; ‘collection\_date’ depicts date of  
231 observation

232 To enable in-depth meta-analyses, we have included 12 fields for soil chemical parameters  
233 that are most commonly reported in mycorrhiza literature, along with the description of  
234 methods for their assessments. The fields ‘pH’, ‘pH\_min’, ‘pH\_max’, ‘pH\_range’ and  
235 ‘pH\_method’ denote the value and measurement method for determining soil pH. The fields  
236 ‘total\_organic\_carbon’ and ‘total\_organic\_carbon\_method’ are used for stating the value  
237 (g/kg soil) and determination method for soil organic carbon content. Similarly,  
238 ‘total\_nitrogen’ and ‘total\_nitrogen\_method’ indicate the value (g/kg) and method of  
239 determination for total soil nitrogen. The fields ‘total\_phosphorus’,  
240 ‘total\_available\_phosphorus’ and ‘total\_available\_phosphorus\_method’ indicate



241 concentration of total phosphorus (mg/kg soil; method, destruction) or available phosphorus  
242 (mg/kg soil) and its method of measurement. ‘Potassium’, ‘calcium’ and ‘magnesium’  
243 represent fields for K, Ca and Mg concentrations (mg/kg soil; method, destruction).

244 There are three fields for plant species. One of the most important fields is ‘species’, which  
245 represents the taxon studied. If no epithet is given, the taxon is identified to genus level. The  
246 field ‘number\_of\_individuals\_studied’ represents the sample size of the original study. The  
247 ‘host\_age’ represents a selectable field of the age of particular individuals, ranging from <1  
248 month to >10 years.

249 Information about mycorrhizal type and colonisation intensity and frequency are given in a  
250 suite of 13 fields due to data complexity. The field ‘mycorrhiza\_type’ is a selection of 15  
251 options indicating combinations from single mycorrhiza types to dual mycorrhizal  
252 colonisation and specifying whether other types were addressed or not. We find these  
253 possibilities important to be considered in scientific analyses, as they allow distinguishing  
254 between negative reports that may be derived from the lack of survey for other mycorrhiza  
255 types besides the focal AM or EcM. This field also includes suggestions for mycorrhiza-like  
256 associations in rootless plants such as hepatics (levels ‘AM-like’, ‘EcM-like’, ‘ErM-like’ and  
257 ‘OrM-like’). The fields ‘AM\_intensity’ and ‘AM\_frequency’ indicate relative intensity  
258 (estimated part of root system) and frequency (% of plant individuals colonized), respectively.  
259 Analogous fields exist for EcM, ErM and OM. The field ‘AM\_method’ enables 17 options for  
260 indicating the method and scale for determination of AM, whereas ‘EcM\_method’,  
261 ‘ErM\_method’ and ‘OM\_method’ offer ten, seven and seven options, respectively.

262 The FungalRoot database contains six remarks fields. The remark\_mycorrhiza\_type  
263 represents notes on reported mycorrhiza type or colonization determination method. Four  
264 fields enable expert opinions about mycorrhizal type of each observation reported in the  
265 database. The fields contain name of the expert (two fields, for two experts respectively) and  
266 the expert comment. These categories warn users against mycorrhizal type mis- assignments,  
267 which are common in the literature (Brundrett, 2017; Tedersoo & Brundrett, 2017; Brundrett  
268 & Tedersoo, 2018), while allowing to store in the database the data reported by the original  
269 publication. The current version of the database contains remarks of two experts: Leho  
270 Tedersoo and Mark Brundrett. However, the dynamic set-up of our database allows data  
271 additions and editing, with a possibility to add new comments by external experts. The field  
272 ‘other\_remarks’ provides additional information about methods, specific experimental

273 treatments, etc. used in each particular paper. Ecological and evolutionary analyses may be  
274 sensitive to such data (Brundrett M, 2018).

275 In order to facilitate use of the data and to enable efficient update and versioning, the  
276 currently published version of the FungalRoot database is built using MySQL programming  
277 language and is integrated to the online analysis work-bench PlutoF (Abarenkov *et al.*,  
278 2010b). This structure enables management and editing of multiple fields, custom search by  
279 any field, and third-party annotations such as comments or specification of missing details.

280

## 281 **Results**

282

### 283 **FungalRoot structure**

284 Our data is freely available for the scientific community, upon citation of this article. The  
285 most updated version of the FungalRoot database and the Recommended mycorrhizal status  
286 for plant genera can be searched and downloaded at <https://plutof.ut.ee/#/study/view/31884>  
287 [available upon acceptance]. The PlutoF platform enables data management by adding  
288 observations, metadata and alternative interpretations about data reliability. We invite  
289 scientific community to provide comments on the mycorrhizal status of individual species and  
290 genera, using the PlutoF platform. The current version of the database and of  
291 “Recommended list...” is provided as supplementary material (Table S3 and S1,  
292 respectively).

293 For data input, there are two principal ways: i) using an upload file in spreadsheet format or  
294 ii) direct data insertion over the web platform, which is analogous to the UNITE database  
295 system (Abarenkov *et al.*, 2010a). Both the online data insertion and upload file contain the  
296 same data fields supplied with specific information. Some fields contain free text, whereas  
297 others enable a selection menu to secure consistent terminology. The scientific terminology  
298 follows generally MIMARKS standards that were supplemented with more detailed terms  
299 (such as mycorrhiza types, specific methods, etc.) that are not covered by these standards.

300

301

302

### 303 **Mycorrhizal data**

304 In total, our database contains 36,303 observations for 14,870 plant species. A total of 19,893  
305 observations included in the database are linked to geographical coordinates (Figure 1).

306 Within the total number of observations, 45% and 2.5% include information about the  
307 intensity and frequency of mycorrhizal colonisation, respectively. Of mycorrhiza types,  
308 studies and observations about putatively AM plants prevail, followed by observations on  
309 EcM plants and non-mycorrhizal plants (Figure 2a). Among recorded habitats where  
310 mycorrhizal plants have been assessed, natural habitats prevail, being mostly forests and  
311 grasslands (Figures 2 b, c). Records are unequally distributed among plant species. Only 0.2%  
312 of the species had more than 40 records (Figure 3). Large number of species (59%) had only  
313 one record; 18 and 8% of species had 2 and 3 records respectively.

314 Observations about mycorrhizal status were unequally distributed globally, with greatest  
315 density in North Europe and North America and lowest density in Africa, Central Asia and  
316 Oceania (Figure 1). This is directly related to historical and present development of  
317 mycorrhiza research in different regions. We found literature about mycorrhizal status of  
318 plants in 9 languages that fit our criteria for inclusion. Relevant literature in English language  
319 clearly dominated, followed by Chinese, Spanish, Portuguese, Russian and French. Among  
320 the countries most of the plants has been examined in Russia, India, China and USA (Figure  
321 2d).

322 In order to examine how distinct mycorrhizal types are distributed across plant growth forms  
323 (trees, herbs, shrubs), we extracted the publically available data from TRY ([https://www.try-  
325 db.org/](https://www.try-<br/>324 db.org/)) (Kattge *et al.*, 2011). In this analysis, we considered the mycorrhizal type to  
326 correspond to that in the original report. to be AM/EcM/EcM all the plant species for which  
327 the respective mycorrhizal types are reported in the FungalRoot, summing up the records  
328 where only one mycorrhizal type is reported (i.e. all other types have been checked and not  
329 found) and the records simply reporting the given mycorrhizal type. Among obligatory  
330 arbuscular mycorrhizal (AM, and EcM-AM plants) 50% are herbaceous, 25% are trees and  
331 the remaining plant species are distributed across the mycorrhizal types. Among facultatively  
332 arbuscular mycorrhizal (AM-NM) plants this ratio is 60/10/30. The great majority of  
333 ectomycorrhizal plants are trees and shrubs (92%) and the most of ericoid mycorrhizal plants  
334 are shrubs (85%). Among non-mycorrhizal plant species, 70% are herbaceous plants, 10% are  
trees and 20% belong to other growth forms (Figure 4).

335

336 **Discussion**

337 The FungalRoot database presented here provides species-by-site information about plant  
338 mycorrhizal associations and colonization intensity. We have significantly advanced previous  
339 attempts of such data compilations by exhaustive search for non-English literature, very old  
340 (>60 years) and recent literature, which resulted in tripling the number of species compared  
341 with the previously largest mycorrhizal type check lists of (Wang & Qiu, 2006) , and  
342 (Akhmetzhanova *et al.*, 2012) that both contain records for ca 3000 plant species (overlapping  
343 to a large extent).

344

345 The database allows to summarize the contemporary information about the distribution of  
346 plant species per mycorrhizal type and distribution of mycorrhizal types per growth form. Our  
347 data confirms the earlier claims that the majority of mycorrhizal plants are arbuscular  
348 mycorrhizal (70% in our dataset), while despite wide ecological distribution (Read, 1991)  
349 ectomycorrhizal plants constitute only a tiny fraction of vascular plant species (0.7% in our  
350 dataset). However, given the fact that our data rather represent the research efforts in  
351 mycorrhizal studies than the true distribution of mycorrhizal plant species, these numbers  
352 should be treated with caution. Our data suggest that only ca 5% of all ca 400,000 vascular  
353 plant species have been examined for mycorrhizal type, with tropical plants being particularly  
354 understudied. Thus, further research is needed to obtain a truly quantitative understanding of  
355 patterns of mycorrhizal types distributions among vascular plants.

356

357 Despite the generally accepted view that the majority of EcM and ErM plants are shrubs and  
358 trees, while AM and not mycorrhizal habit are more or less equally distributed among plant  
359 growth forms, quantitative analyses on distribution of plant mycorrhizal types among growth  
360 forms has not been conducted till now. The data shown in the Figure 3 constitute the first  
361 attempt of quantitative exploration of thus far available information about mycorrhizal types  
362 of plant growth forms. The question what aspects of plant and mycorrhizal fungal physiology  
363 enable the overwhelming prevalence of woody forms among ectomycorrhizal and ericoid  
364 mycorrhizal plants is particularly intriguing. Further ecophysiological analyses of growth  
365 form preferences among plant mycorrhizal types will allow linking spatial patterns of plant  
366 functional types distributions to mycorrhizal habits. Given that the majority of ecological  
367 models of regional and global vegetation distribution and ecosystem functioning are based on

368 plant functional types, this information will advance our understanding of impacts of  
369 mycorrhizas on functioning of terrestrial ecosystems.

370

371 Erroneous mycorrhizal diagnoses often provided in old literature and their blind, uncritical  
372 use has resulted in biased or incorrect interpretations of mycorrhizal type effects on  
373 evolutionary, biogeographic and ecophysiological processes (Brundrett & Tedersoo, 2019;  
374 Tedersoo *et al.*, 2019). To overcome these issues, we compared the original records with  
375 expert opinions derived from the rest of the data and other publications to construct a  
376 recommendation list for plant mycorrhizal associations (Table S1). It must be, however, noted  
377 that using this list uncritically has the following limitations: 1) it provides insufficient  
378 information about individual species and the effect of edaphic and climatic effects on  
379 mycorrhizal status; and 2) it may offer erroneous assignments to facultatively mycorrhizal  
380 taxa in ecosystems that are early successional, or exhibit extreme levels of nutrients or  
381 climatic conditions, such as alpine, flooded or fertilized habitats. In such cases, we  
382 recommend considering species-level assignments, provided in the FungalRoot database,  
383 accompanied by the edaphic data from specific regions or biomes, available as metadata in  
384 FungalRoot database. For species and genera not covered in FungalRoot database, we  
385 strongly recommend in situ determination of mycorrhizal types and mycorrhizal colonisation  
386 to reduce the determination biases.

387 In conclusion, the FungalRoot database features a number of unique characteristics, which  
388 will enrich the possibilities of scientific research based on the compiled metadata about  
389 locality, biome and edaphic conditions of the plant root sampling points. Such data enables  
390 quantitative analyses of drivers of mycorrhizal fungal colonization and distribution of  
391 mycorrhizal types, needed in order to understand the impacts of mycorrhizal symbiosis on  
392 functioning of the human-affected ecosystems. Furthermore, the database records have been  
393 traced to original publications, which enabled us to eliminate duplicated records caused by  
394 combining information from multiple compilations. The thorough quality check of the of  
395 mycorrhizal type data in the database, alongside with the recommendations for the genus-  
396 level mycorrhizal colonization type (Table S1) considerably reduce the amount of flaws in  
397 scientific studies addressing mycorrhizal type effects. Therefore, our database can be readily  
398 used for assessing the ecophysiological roles of mycorrhizal types in plant communities and  
399 ecosystem services and in comparative phylogenetics analyses targeting trait evolution. When  
400 coupled to other plant trait, ecological, evolutionary, soil and climate data, the FungalRoot

401 database enables to test large-scale hypotheses about global processes such as biogeochemical  
402 nutrient cycling, climate change impact, and co-evolution of plants and fungi.

403

#### 404 **Acknowledgements**

405 LT received funding from the Estonian Science Foundation (PUT1399, MOBERC). NS, MB  
406 and SV were supported by the vidi grant 016.161.318 provided by the Netherlands  
407 Organization for scientific research (NWO), issued to NS.

408

## 409 References

- 410 **Abarenkov K, Henrik Nilsson R, Larsson KH, Alexander JJ, Eberhardt U, Erland S, Høiland K, Kjølter R, Larsson**  
411 **E, Pennanen T. 2010a.** The UNITE database for molecular identification of fungi—recent updates and  
412 future perspectives. *New Phytologist* **186**(2): 281-285.
- 413 **Abarenkov K, Tedersoo L, Nilsson RH, Vellak K, Saar I, Veldre V, Parmasto E, Proulx M, Aan A, Ots M. 2010b.**  
414 **PlutoF—a web based workbench for ecological and taxonomic research, with an online**  
415 **implementation for fungal ITS sequences. *Evolutionary Bioinformatics* **6**: EBO. S6271.**
- 416 **Akhmetzhanova AA, Soudzilovskaia NA, Onipchenko VG, Cornwell WK, Agafonov VK, Selivanov IA,**  
417 **Cornelissen JHC. 2012.** A rediscovered treasure: mycorrhizal intensity database for 3000 vascular  
418 plants species across the former Soviet Union. *Ecology* **93**: 689-690.
- 419 **Averill C, Hawkes CV. 2016.** Ectomycorrhizal fungi slow soil carbon cycling. *Ecology Letters* **19**(8): 937-947.
- 420 **Brundrett M. 2009.** Mycorrhizal associations and other means of nutrition of vascular plants: understanding  
421 the global diversity of host plants by resolving conflicting information and developing reliable means  
422 of diagnosis. *Plant and Soil* **320**(1-2): 37-77.
- 423 **Brundrett M 2017.** Global Diversity and Importance of Mycorrhizal and Nonmycorrhizal Plants. In: Tedersoo L  
424 ed. *Biogeography of mycorrhizal symbiosis*: Springer, 533-557.
- 425 **Brundrett M, Tedersoo L. 2018.** Evolutionary history of mycorrhizal symbioses and global host plant diversity.  
426 *New Phytologist*.
- 427 **Brundrett M, Tedersoo L. 2019.** Misdiagnosis of mycorrhizas and inappropriate recycling of data can lead to  
428 false conclusions. *New Phytologist*.
- 429 **Bueno C. 2019.** Misdiagnosis and uncritical use of plant mycorrhizal data are not the only elephants in the  
430 room. *New Phytologist* **in press**.
- 431 **Cornelissen JHC, Aerts R, Cerabolini B, Werger MJA, van der Heijden MGA. 2001.** Carbon cycling traits of plant  
432 species are linked with mycorrhizal strategy. *Oecologia* **129**(4): 611-619.
- 433 **Elumeeva TG, Onipchenko VG, Cornelissen JH, Semenova GV, Perevedentseva LG, Freschet GT, van Logtestijn**  
434 **RS, Soudzilovskaia NA. 2018.** Is intensity of plant root mycorrhizal colonization a good proxy for plant  
435 growth rate, dominance and decomposition in nutrient poor conditions? *Journal of Vegetation*  
436 *Science*.
- 437 **Gerz M, Bueno CG, Zobel M, Moora M. 2016.** Plant community mycorrhization in temperate forests and  
438 grasslands: relations with edaphic properties and plant diversity. *Journal of Vegetation Science* **27**(1):  
439 89-99.
- 440 **Harley JL, Harley E. 1987.** A check-list of mycorrhiza in the British flora. *New Phytologist* **105**(s1): 1-102.
- 441 **Hempel S, Gotzenberger L, Kuhn I, Michalski SG, Rillig MC, Zobel M, Moora M. 2013.** Mycorrhizas in the  
442 Central European flora - relationship with plant life history traits and ecology. *Ecology* **94**: 1389-1399.
- 443 **Hoeksema J, Bever J, Chakraborty S, Chaudhary V, Gardes M, Gehring C, Hart M, Housworth E, Kaonongbua**  
444 **W, Klironomos J, et al. 2018.** Evolutionary history of plant hosts and fungal symbionts predicts the  
445 strength of mycorrhizal mutualism. *Communication Biology*: 1:116.
- 446 **Hoeksema JD, Chaudhary VB, Gehring CA, Johnson NC, Karst J, Koide RT, Pringle A, Zabinski C, Bever JD,**  
447 **Moore JC, et al. 2010.** A meta-analysis of context-dependency in plant response to inoculation with  
448 mycorrhizal fungi. *Ecology Letters* **13**(3): 394-407.
- 449 **Karst J, Marczak L, Jones MD, Turkington R. 2008.** The mutualism-parasitism continuum in ectomycorrhizas: A  
450 quantitative assessment using meta-analysis. *Ecology* **89**(4): 1032-1042.
- 451 **Kattge J, Diaz S, Lavorel S, Prentice C, Leadley P, Bonisch G, Garnier E, Westoby M, Reich PB, Wright IJ, et al.**  
452 **2011.** TRY - a global database of plant traits. *Global Change Biology* **17**(9): 2905-2935.
- 453 **Klironomos J. 2000.** Host-specificity and functional diversity among arbuscular mycorrhizal fungi. *Microbial*  
454 *Biosystems* **1**: 845-851.
- 455 **Klironomos J, Zobel M, Tibbett M, Stock WD, Rillig MC, Parrent JL, Moora M, Koch AM, Facelli JM, Facelli E, et**  
456 **al. 2011.** Forces that structure plant communities: quantifying the importance of the mycorrhizal  
457 symbiosis. *New Phytologist* **189**(2): 366-370.
- 458 **Klironomos JN, McCune J, Hart M, Neville J. 2000.** The influence of arbuscular mycorrhizae on the relationship  
459 between plant diversity and productivity. *Ecology Letters* **3**(2): 137-141.
- 460 **Koele N, Dickie IA, Oleksyn J, Richardson SJ, Reich PB. 2012.** No globally consistent effect of ectomycorrhizal  
461 status on foliar traits. *New Phytologist* **196**(3): 845-852.
- 462 **Kohout P 2017.** Biogeography of ericoid mycorrhiza. In: Tedersoo L ed. *Biogeography of mycorrhizal symbiosis*:  
463 Springer, 179-193.

- 464 **Leake JR, Johnson D, Donnelly DP, Muckle GE, Boddy L, Read DJ. 2004.** Networks of power and influence: the  
465 role of mycorrhizal mycelium in controlling plant communities and agroecosystem functioning.  
466 *Canadian Journal of Botany-Revue Canadienne De Botanique* **82**(8): 1016-1045.
- 467 **Maltz MR, Treseder KK. 2015.** Sources of inocula influence mycorrhizal colonization of plants in restoration  
468 projects: a meta-analysis. *Restoration Ecology* **23**(5): 625-634.
- 469 **Merckx V. 2013.** Mycoheterotrophy. *Springer, New York, NY. doi 10: 978-971.*
- 470 **Phillips RP, Brzostek E, Midgley MG. 2013.** The mycorrhizal-associated nutrient economy: a new framework for  
471 predicting carbon-nutrient couplings in temperate forests. *New Phytologist* **199**(1): 41-51.
- 472 **Read DJ. 1991.** Mycorrhizas in ecosystems. *Experientia* **47**(4): 376-391.
- 473 **Smith SE, Read DJ. 2008.** *Mycorrhizal Symbiosis*. London: Academic Press.
- 474 **Soudzilovskaia NA, Douma JC, Akhmetzhanova AA, van Bodegom PM, Cornwell WK, Moens EJ, Treseder KK,**  
475 **Tibbett M, Wang YP, Cornelissen JHC. 2015.** Global patterns of plant root colonization intensity by  
476 mycorrhizal fungi explained by climate and soil chemistry. *Global Ecology and Biogeography* **24**(3):  
477 371-382.
- 478 **Soudzilovskaia NA, Heijden MGA, Cornelissen JHC, Makarov MI, Onipchenko VG, Maslov MN,**  
479 **Akhmetzhanova AA, Bodegom PM. 2015.** Quantitative assessment of the differential impacts of  
480 arbuscular and ectomycorrhiza on soil carbon cycling. *New Phytologist* **208**(1): 280-293.
- 481 **Tedersoo L 2017.** Global biogeography and invasions of ectomycorrhizal plants: past, present and future. In:  
482 Tedersoo L ed. *Biogeography of mycorrhizal symbiosis*: Springer, in press.
- 483 **Tedersoo L, Bahram M. 2019.** Mycorrhizal types differ in ecophysiology and alter plant nutrition and soil  
484 processes. *Biological Reviews*.
- 485 **Tedersoo L, Brundrett M 2017.** Evolution of Ectomycorrhizal Symbiosis in Plants. In: Tedersoo L ed.  
486 *Biogeography of mycorrhizal symbiosis*: Springer, 409-468.
- 487 **Tedersoo L, Rahimlou S, Brundrett M. 2019.** Misallocation of mycorrhizal traits leads to misleading results.  
488 *Proceedings of the national Academy of Sciences USA, in press.*
- 489 **Terrer C, Vicca S, Hungate BA, Phillips RP, Prentice IC. 2016.** Mycorrhizal association as a primary control of  
490 the CO<sub>2</sub> fertilization effect. *Science* **353**(6294): 72-74.
- 491 **Toju H, Sato H, Tanabe AS. 2014.** Diversity and spatial structure of belowground plant-fungal symbiosis in a  
492 mixed subtropical forest of ectomycorrhizal and arbuscular mycorrhizal plants. *Plos One* **9**(1): e86566.
- 493 **Treseder KK. 2013.** The extent of mycorrhizal colonization of roots and its influence on plant growth and  
494 phosphorus content. *Plant and Soil* **371**: 1-13.
- 495 **van der Heijden MGA, Klironomos JN, Ursic M, Moutoglis P, Streitwolf-Engel R, Boller T, Wiemken A, Sanders**  
496 **IR. 1998.** Mycorrhizal fungal diversity determines plant biodiversity, ecosystem variability and  
497 productivity. *Nature* **396**(6706): 69-72.
- 498 **Veresoglou SD, Chen BD, Rillig MC. 2012a.** Arbuscular mycorrhiza and soil nitrogen cycling. *Soil Biology &*  
499 *Biochemistry* **46**: 53-62.
- 500 **Veresoglou SD, Menexes G, Rillig MC. 2012b.** Do arbuscular mycorrhizal fungi affect the allometric partition of  
501 host plant biomass to shoots and roots? A meta-analysis of studies from 1990 to 2010. *Mycorrhiza*  
502 **22**(3): 227-235.
- 503 **Wang B, Qiu YL. 2006.** Phylogenetic distribution and evolution of mycorrhizas in land plants. *Mycorrhiza* **16**(5):  
504 299-363.

505



506 **Table 1. Description of FungalRoot database fields**

| <b>Publication</b>                | <i>Field explanation</i>                                                                                                                                                                                                                                                                                                                                                                                                                                                                                                           |
|-----------------------------------|------------------------------------------------------------------------------------------------------------------------------------------------------------------------------------------------------------------------------------------------------------------------------------------------------------------------------------------------------------------------------------------------------------------------------------------------------------------------------------------------------------------------------------|
| <i>dataset ID</i>                 | The unique number identifying the observation                                                                                                                                                                                                                                                                                                                                                                                                                                                                                      |
| <i>publication doi</i>            | DOI number of the original reference (“unpublished”, when the reference is not published)                                                                                                                                                                                                                                                                                                                                                                                                                                          |
| <i>original reference</i>         | Name of original references from which the records were extracted (in APA format)                                                                                                                                                                                                                                                                                                                                                                                                                                                  |
| <i>non original reference</i>     | In the original is unchecked, the indirect reference (in APA format)                                                                                                                                                                                                                                                                                                                                                                                                                                                               |
| <i>original_ref_checked [y/n]</i> | For compilations, this field specified if the original reference was checked or not                                                                                                                                                                                                                                                                                                                                                                                                                                                |
| <i>chinese name</i>               | In case of Chinese publications, the original study title                                                                                                                                                                                                                                                                                                                                                                                                                                                                          |
| <b>Observation location</b>       |                                                                                                                                                                                                                                                                                                                                                                                                                                                                                                                                    |
| <i>plot_name</i>                  | Name of the plot the sample belongs to according to the original publication                                                                                                                                                                                                                                                                                                                                                                                                                                                       |
| <i>habitat_naturality</i>         | Habitat of plants (selection: natural, plantation, nursery, greenhouse, pot, axenic, wasteland, early successional, other)                                                                                                                                                                                                                                                                                                                                                                                                         |
| <i>biome</i>                      | Specific biome where the observation was made. Selection: anthropogenic cropland; anthropogenic rangeland; anthropogenic urban; desert temperate; desert tropical; forest Mediterranean; forest subpolar coniferous; forest temperate broadleaf; forest temperate coniferous; forest tropical broadleaf; forest tropical coniferous; grassland flooded; grassland temperate; grassland tropical; mangrove; tundra; aquatic: freshwater lake; aquatic: freshwater river; aquatic: marginal sea; aquatic: marginal salt marsh; other |
| <i>Country</i>                    | Country where the observation was made. Selection form a list.                                                                                                                                                                                                                                                                                                                                                                                                                                                                     |
| <i>Collection date</i>            | Date of sampling (YYYY-MM-DD; YYYY-MM, YYYY or XXXX-                                                                                                                                                                                                                                                                                                                                                                                                                                                                               |

|                               |                                                                                                                                                                           |
|-------------------------------|---------------------------------------------------------------------------------------------------------------------------------------------------------------------------|
|                               | MM-DD if year is unknown)                                                                                                                                                 |
| <i>Latitude</i>               | Latitude of the sampling location (WGS84)                                                                                                                                 |
| Longitude                     | Longitude of the sampling location (WGS84)                                                                                                                                |
| Elevation                     | Elevation of the sampling site (m above sea level)                                                                                                                        |
| <b>Environmental metadata</b> |                                                                                                                                                                           |
| pH                            | Soil pH value; provided in a case of single measurement                                                                                                                   |
| pH_min                        | Minimum value of soil pH                                                                                                                                                  |
| pH_max                        | Maximum value of soil pH                                                                                                                                                  |
| pH_range                      | Value range of soil pH                                                                                                                                                    |
| pH method                     | Method used for determining soil pH. Selection: 'water' or 'KCl'                                                                                                          |
| Total organic carbon          | Total organic carbon content of the soil (g C/kg soil). When original values were expressed in g Org Matter/ kg soil, a conversion of 0.48g Org Matter = 1g C was applied |
| C_min                         | Minimum value of soil organic carbon concentration (g C/kg soil)                                                                                                          |
| C_max                         | Maximum value of soil organic carbon concentration (g C/kg soil)                                                                                                          |
| C_range                       | Value range of soil organic carbon concentration (g C/kg soil)                                                                                                            |
| C_unit                        | The unit used for soil organic carbon concentration (g C/kg soil)                                                                                                         |
| Total organic carbon method   | Method used for determining the total soil organic carbon. Selection: Kjeldahl; elemental analyser; furnace                                                               |
| Total nitrogen                | Total nitrogen content of the soil sample (g N/kg soil). Nitrate and ammonium values are calculated based on atom mass, coefficients 0.226 and 0.778, respectively)       |
| N_min                         | Minimum value of total soil nitrogen concentration (g N/kg soil)                                                                                                          |

|                              |                                                                                                                                                |
|------------------------------|------------------------------------------------------------------------------------------------------------------------------------------------|
| N_max                        | Maximum value of total soil nitrogen concentration (g N/kg soil)                                                                               |
| N_range                      | Value range of total soil nitrogen concentration (g N/kg soil)                                                                                 |
| Total nitrogen method        | Method used for determining the total soil nitrogen. Selection: Kjeldahl; elemental analyser                                                   |
| Total phosphorus             | Total phosphorus concentration in the soil sample (mg P/ kg soil)                                                                              |
| Available phosphorus_mean    | Available phosphorus concentration in the soil sample (mean value)                                                                             |
| P_min                        | Minimum value of available phosphorus concentration                                                                                            |
| P_max                        | Maximum value of available phosphorus concentration                                                                                            |
| P_range                      | Value range of available phosphorus concentration                                                                                              |
| P_unit                       | The unit used for available phosphorus concentration                                                                                           |
| Available phosphorus method: | Reference or method used for determining the concentration of soil phosphorus. Selection: oxalate; ammonium acetate; Bray; water; Olsen; other |
| Potassium                    | Total concentration of soil potassium                                                                                                          |
| K_min                        | Minimum value of potassium concentration                                                                                                       |
| K_max                        | Maximum value of potassium concentration                                                                                                       |
| K_range                      | Value range of potassium concentration                                                                                                         |
| K_unit                       | The unit used for potassium concentration                                                                                                      |
| Calcium                      | Total concentration of calcium                                                                                                                 |
| Ca_min                       | Minimum value of calcium concentration                                                                                                         |
| Ca_max                       | Maximum value of calcium concentration                                                                                                         |
| Ca_range                     | Value range of calcium concentration                                                                                                           |
| Ca_unit                      | The unit used for calcium concentration                                                                                                        |
| Magnesium                    | Total concentration of magnesium                                                                                                               |

|                                       |                                                                                                                                                                                                                                                                                                                                                                                                                                                 |
|---------------------------------------|-------------------------------------------------------------------------------------------------------------------------------------------------------------------------------------------------------------------------------------------------------------------------------------------------------------------------------------------------------------------------------------------------------------------------------------------------|
| Mg_min                                | Minimum value of magnesium concentration                                                                                                                                                                                                                                                                                                                                                                                                        |
| Mg_max                                | Maximum value of magnesium concentration                                                                                                                                                                                                                                                                                                                                                                                                        |
| Mg_range                              | Value range of magnesium concentration                                                                                                                                                                                                                                                                                                                                                                                                          |
| Mg_unit                               | The unit used for magnesium concentration                                                                                                                                                                                                                                                                                                                                                                                                       |
| <b>Host plant description</b>         |                                                                                                                                                                                                                                                                                                                                                                                                                                                 |
| Species                               | Genus name and epithet of original observations. When epithet is not given, only genus name was is recorded. The recorded observations were checked against the Plant List database ( <a href="http://www.plantlist.com">www.plantlist.com</a> )                                                                                                                                                                                                |
| Number of plants                      | N, the number of individuals of the plant species studied                                                                                                                                                                                                                                                                                                                                                                                       |
| <i>Host age</i>                       | Age of the host plant observed. Selection: <1 months; 1 months (30-60 d); 2 months (61-90 days); 3 months (91-120 days); 4 months (121-150 days); 5 months (151-180 days); 6 months (181-210 days); 7 months (211-240 days); 8 months (241-270 days) 9 months (271-300 days); 10 months (301-330 days); 11 months (331-365 days); 12 months (365-384 days); <1 year (30-365 days); 12-24 months (365-730 days); 2-10 years (sapling); >10 years |
| <b>Plant mycorrhizal colonization</b> |                                                                                                                                                                                                                                                                                                                                                                                                                                                 |
| <i>mycorrhiza_type</i>                | Mycorrhizal type detected. Selection: AM (no others); AM (others not addressed); EcM (no others); EcM (others not addressed); ErM; OM; non-mycorrhizal (checked for all types); non-EcM (others not addressed); non-AM (others not addressed); EcM-AM; ErM-AM; ErM-EcM; AM-like (non-vascular plants); EcM-like (non-vascular plants); ErM-like (non-vascular plants); OM-like (non-vascular plants)                                            |

|                      |                                                                                                                                                                                                                                                                                                                                                                                                                                                                             |
|----------------------|-----------------------------------------------------------------------------------------------------------------------------------------------------------------------------------------------------------------------------------------------------------------------------------------------------------------------------------------------------------------------------------------------------------------------------------------------------------------------------|
| <i>AM intensity</i>  | Extent of root system colonized by AM fungi                                                                                                                                                                                                                                                                                                                                                                                                                                 |
| <i>AM frequency</i>  | Percentage of individual plants colonized by AM fungi                                                                                                                                                                                                                                                                                                                                                                                                                       |
| <i>AM method</i>     | Method used to determine AM fungi colonization intensity. Selection: McGonigle et al. 1990: RLC (%); Phillips & Hayman 1970: RLC (%); Selivanov 1981: RLC (%); scale 0-5 (Kormanik & McGraw 1982); scale 0-4 (Peuss 1958/Mejstrik); scale 0-3; Giovannetti & Mosse 1980: slide-length; Giovannetti & Mosse 1980: gridline intersect; Herper 1977: colorimetric; Sieverding,1991: RLE; qPCR; molecular identification; simple observation; synthesis; other (% scale); other |
| <i>EcM intensity</i> | Extent of root system colonized by EcM fungi                                                                                                                                                                                                                                                                                                                                                                                                                                |
| <i>EcM frequency</i> | Percentage of individual plants colonized by EcM fungi.                                                                                                                                                                                                                                                                                                                                                                                                                     |
| <i>EcM method</i>    | Method used to determine EcM colonization intensity. Selection: root tips colonized (%); root length colonized (%); scale 0-4; scale 0-3; scale 0-2; qPCR; molecular identification; EcM tips/m root; simple observation; other                                                                                                                                                                                                                                             |
| <i>ErM intensity</i> | Extent of root system colonized with ErM fungi                                                                                                                                                                                                                                                                                                                                                                                                                              |
| <i>ErM frequency</i> | Percentage of individual plants colonized with ErM fungi. Relevant when intensity is not given.                                                                                                                                                                                                                                                                                                                                                                             |
| <i>ErM method</i>    | Method used to determine ErM fungi colonization intensity. Selection: root length colonized (%); scale 0-4; scale 0-3; qPCR; molecular identification; simple observation; other                                                                                                                                                                                                                                                                                            |
| <i>OM intensity</i>  | Extent of root system colonized with OM fungi                                                                                                                                                                                                                                                                                                                                                                                                                               |
| <i>OM frequency</i>  | Percentage of individual plants colonized by OM fungi. Relevant when intensity is not given.                                                                                                                                                                                                                                                                                                                                                                                |
| <i>OM method</i>     | Method used to determine OM colonization intensity. Selection: root length colonized (%); scale 0-4; scale 0-3; scale 0-2; qPCR; molecular identification; simple observation; other.                                                                                                                                                                                                                                                                                       |

|                                            |                                                             |
|--------------------------------------------|-------------------------------------------------------------|
| <i>remark:</i><br><i>Mycorrhiza type</i>   | A note on reported mycorrhiza type or determination method. |
| <i>Curator remark</i><br><i>1: name</i>    | Name of the expert providing opinion                        |
| <i>Curator remark</i><br><i>1: comment</i> | Comment                                                     |
| <i>Curator remark</i><br><i>2: name</i>    | Name of the second expert providing opinion                 |
| <i>Curator remark</i><br><i>2: comment</i> | Comment                                                     |

507

508

509

510 **Figure captions.**

511 **Figure 1.** Georeferenced records included in the FungalRoot database. Circle size reflects  
512 number of observations per site. (a) arbuscular mycorrhizal colonization, (b) ectomycorrhizal  
513 colonization, (c) ericoid mycorrhizal colonization, (d) no mycorrhizal colonization.

514 **Figure 2.** Number of records in the FungalRoot database (a) per most common mycorrhizal  
515 type, (b) per habitat type, (c) per major biome type, (c) per country. In the panel 'a' the  
516 EcM/AM category refers to the cases of mixed colonization by the two types of mycorrhizal  
517 fungi. The number of record for the types 'ErM / AM', 'ErM / EcM', 'AM-like (non-vascular  
518 plants)', 'EcM-like (non-vascular plants)', 'ErM-like (non-vascular plants)' and, 'OM-like  
519 (non-vascular plants)' is 9, 14, 8, 22, 0, 0, respectively. Due to small values these categories  
520 are not shown in the graph. In the panel 'c' the biome 'Aquatic' includes mangroves; The  
521 'Antrop.' stays for 'Atntropogenic'. In the panel 'd' the category 'Former USSR' refers to the  
522 records originated from the (Akhmetzhanova *et al.*, 2012) dataset, that are not assigned to  
523 Russia, but are assigned to other republics of USSR (now independent countries).

524 **Figure 3.** Plant species that have highest number of records (>40) in the FungalRoot database.

525 **Figure 4.** Distribution of plant growth form types across the main mycorrhizal types: AM –  
526 arbuscular mycorrhizal plants, EcM ectomycorrhizal, ErM – ericoid mycorrhizal, NM – non-  
527 mycorrhizal.

528

529

530

531 **Figures**

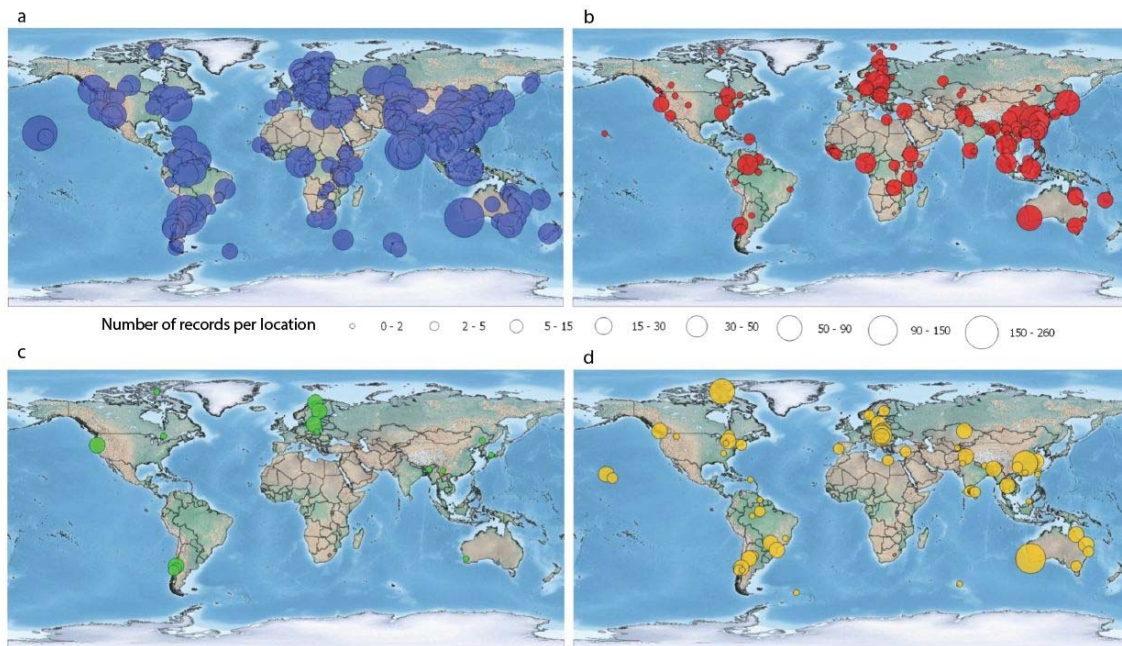

532

533 **Figure 1. Georeferenced records included in the FungalRoot database. Circle size**  
534 **reflects number of observations per site. (a) arbuscular mycorrhizal colonization, (b)**  
535 **ectomycorrhizal colonization, (c) ericoid mycorrhizal colonization, (d) no mycorrhizal**  
536 **colonization.**



a) Number of records per mycorrhizal type

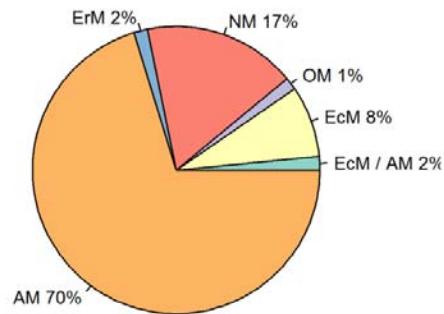

b) Number of records per habitat type

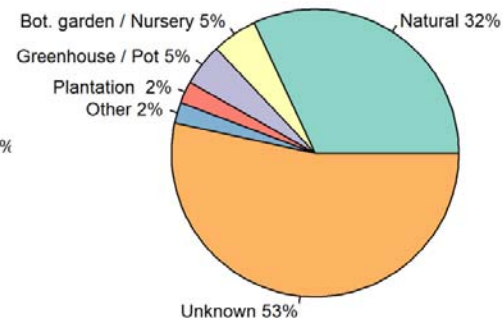

c) Number of records per major biome type

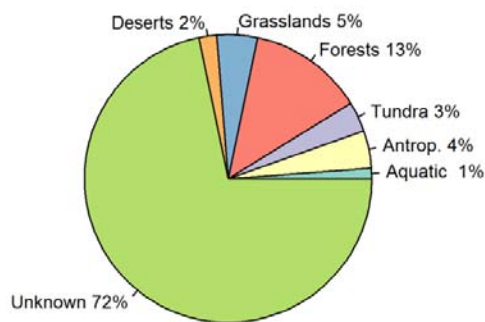

d) Number of records per country

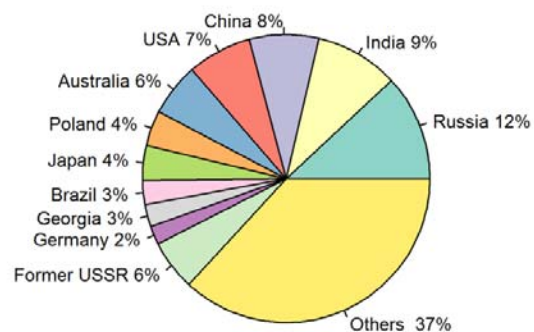

537

538 **Figure 2. Number of records in the FungalRoot database (a) per most common**  
 539 **mycorrhizal type, (b) per habitat type, (c) per major biome type, (c) per country. In the**  
 540 **panel ‘a’ the EcM/AM category refers to the cases of mixed colonization by the two**  
 541 **types of mycorrhizal fungi. The number of record for the types ‘ErM / AM’, ‘ErM /**  
 542 **EcM’, ‘AM-like (non-vascular plants)’, ‘EcM-like (non-vascular plants)’, ‘ErM-like**  
 543 **(non-vascular plants)’ and, ‘OM-like (non-vascular plants)’ is 9, 14, 8, 22, 0, 0 ,**  
 544 **respectively. Due to small values these categories are not shown in the graph. In the**  
 545 **panel ‘c’ the biome ‘Aquatic’ includes mangroves; The ‘Antrop.’ stays for**  
 546 **‘Atntropogenic’. In the panel ‘d’ the category ‘Former USSR’ refers to the records**  
 547 **originated from the (Akhmetzhanova *et al.*, 2012) dataset, that are not assigned to**  
 548 **Russia, but are assigned to other republics of USSR (now independent countries).**

549

550

551

552

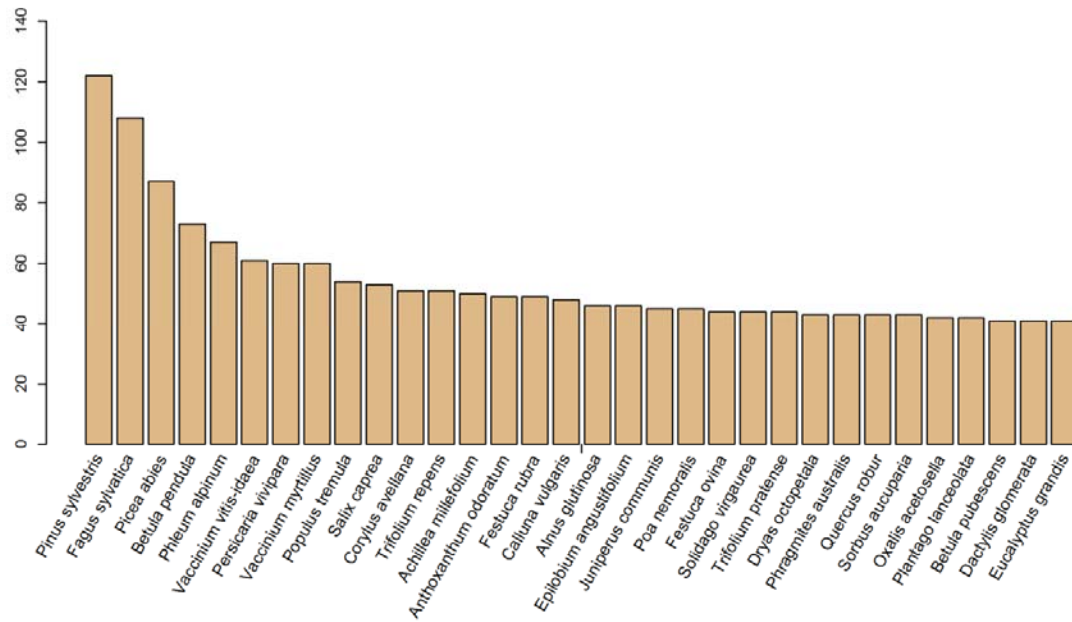

553

554 **Figure 3. Plant species that have highest number of records (>40) in the FungalRoot**  
555 **database.**

556

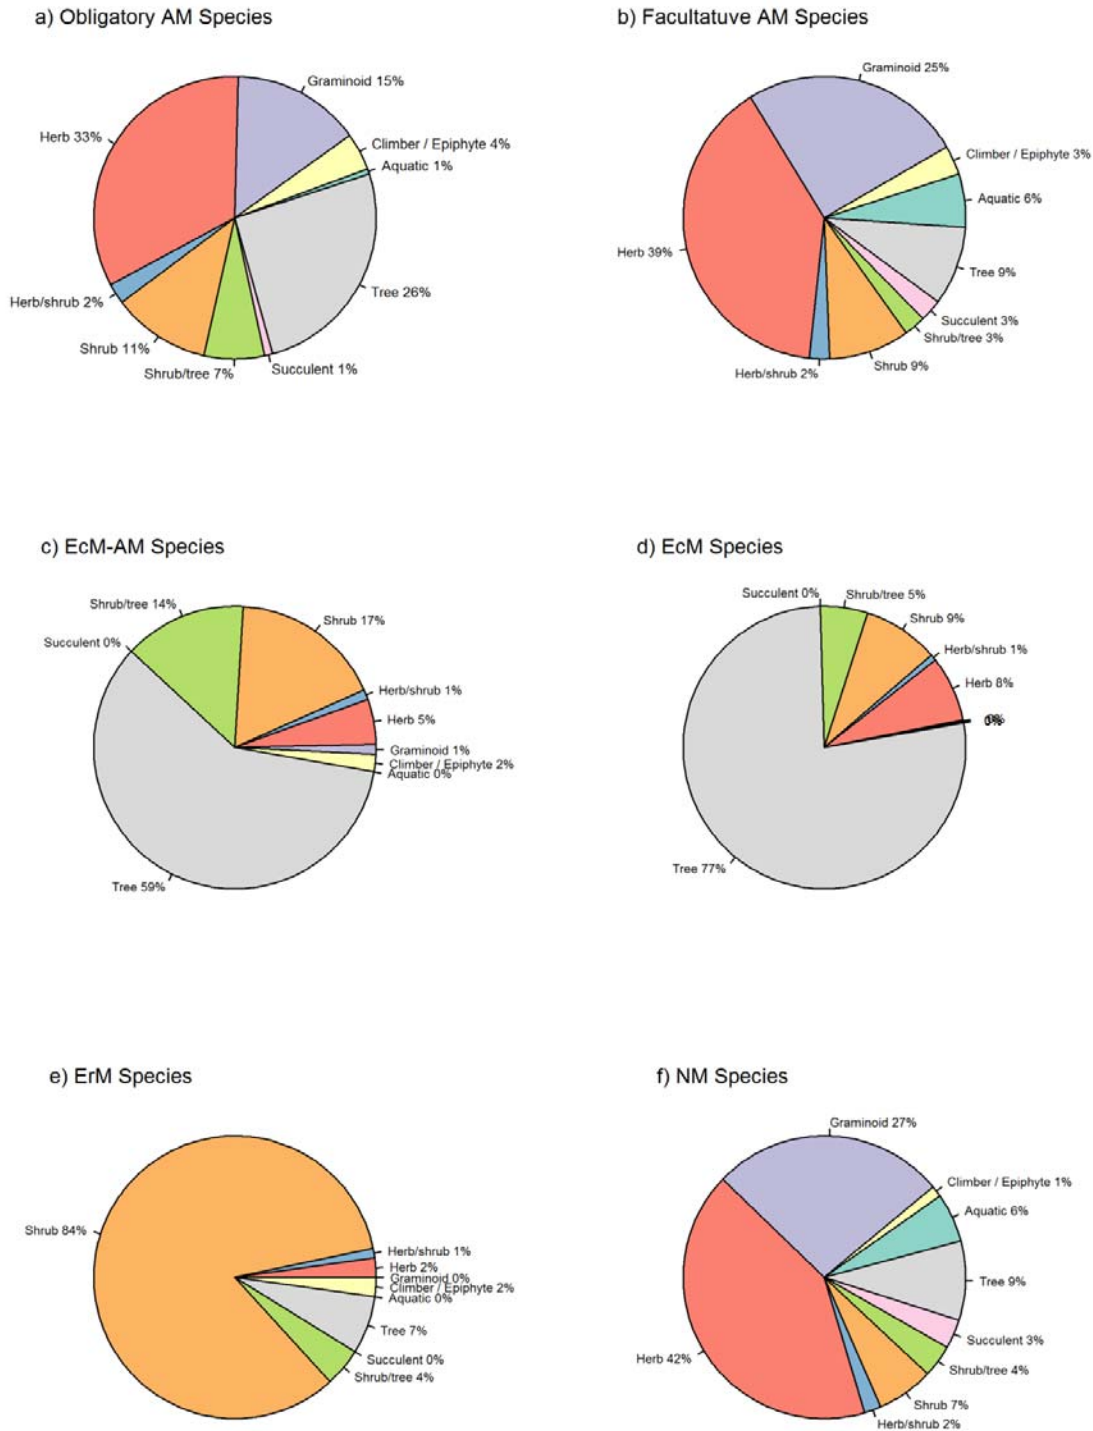

557

558 **Figure 4. Distribution of plant growth form types across the main mycorrhizal types:**  
 559 **AM – arbuscular mycorrhizal plants, EcM ectomycorrhizal, ErM – ericoid mycorrhizal,**  
 560 **NM – non-mycorrhizal.**

561
